# Supplementary material
Source: PubMed Central journal article supplement (PMC4897591)
Supplement: NIHMS788794-supplement-supplement_1.pdf [file NIHMS788794-supplement-supplement_1.pdf]

### Supplementary Table 1. Calculation of collagen half-life for OA knee and hip cartilage.

Racemization rates are affected by temperature. Haimovici suggests that the intra-articular temperature of hips and knees may differ, estimated at ~37°C for hips and ~33°C for knees<sup>1</sup>. We therefore performed half-life calculations based on previously published methods<sup>2</sup> with temperature adjusted  $k_i$  values. To calculate protein half-life we calculated the protein turnover constant ( $k_T$ ) using the following equation:

#### Equation 1

$$d(D/(D+L))/dt = K_i - K_T(D/(D+L))$$

where:

$d(D/(D+L))/dt$  is the rate of change of racemization with time. This was determined by calculating the slopes of a linear regression analysis for Asp-RR (i.e. D/D+L) for OA hips (slope = 0.00089,  $r^2=0.371$ ,  $p=0.007$ ) and OA knees (slope = 0.0003,  $r^2=0.157$ ,  $p=0.093$ ) using data presented in Figure 1B. Our determined slopes/accumulation rates were similar to previously published rates for articular cartilage and disc cartilages ( $2.58 \times 10^{-4}/\text{yr}$  and  $5.18-6.74 \times 10^{-4}/\text{yr}$  respectively<sup>3</sup>).

$(D/(D+L))$  is the racemization ratio previously calculated and used in Figures 1-3;

$K_T$  is the protein turnover constant;

$K_i$  is the racemization rate constant (derivation explained below).

#### Derivation of $K_i$ for collagen at 33°C and 37°C.

As with the earlier work, we based our calculation of  $K_i$  on the value determined for collagen from tooth dentin, which has no or minimal turnover throughout life. The  $k_i$  for dentin collagen has been estimated previously to be  $7.6 \times 10^{-4}$  and the enamel temperature is estimated to be 33°C, which is proposed to be the intraarticular knee temperature<sup>1</sup>. However, the hip intraarticular temperature is possibly higher and much nearer core body temperature of 37°C so the  $K_i$  value would need to be adjusted for temperature using the following equation originally derived by Bada 1981<sup>4</sup>;

#### Equation 2

$$K_{i2}(T_2) = K_{i1}(T_1) \times \exp(-(16,890 \times (T_1 - T_2))/(T_2 \times T_1))$$

Where:

$K_{i2}$  = the temperature adjusted  $K_i$  constant to be calculated;

$T_2$  = the new temperature in Kelvin (37°C = 310.15°K);

$K_{i1}$  = the original  $K_i$  calculated for dentin collagen ( $7.6 \times 10^{-4}$ );

$T_1$  = the original  $K_i$  temperature for dentin collagen (33°C = 306.15°K).

16,890 = activation energy (Ea)/the gas constant (R), originally determined by Bada<sup>4</sup>.

Using the above equation, a  $K_i$  for collagen racemization of 0.00152 at 37°C can be determined and used as the  $K_i$  for the hip turnover rate calculation.

### Calculation of half-life for collagen.

Using equation 1 and the  $K_i$  values determined from equation 2 we calculated  $K_T$  for both OA knee and OA hip assuming the same intra-articular temperature of 37°C and dissimilar temperatures of 33°C and 37°C, respectively (see Supplementary Table 1 below). The  $K_T$  value was converted into a collagen half-life using the following equation:

#### Equation 3

$$t_{1/2} = \ln(2)/K_T$$

**Supplementary Table 1.** Collagen turnover (half-life) in OA hip and knee cartilages of individual patients based on different estimations of intra-articular temperatures.

| OA Knee collagen $t_{1/2}$ at 33°C and 37°C |         |                 |                           |                 |                           | OA Hip collagen $t_{1/2}$ at 37°C |         |                 |                           |
|---------------------------------------------|---------|-----------------|---------------------------|-----------------|---------------------------|-----------------------------------|---------|-----------------|---------------------------|
| Age                                         | d/(d+L) | $K_T$<br>(33°C) | $t_{1/2}$ (33°C)<br>years | $K_T$<br>(37°C) | $t_{1/2}$ (37°C)<br>years | Age                               | d/(d+L) | $K_T$<br>(37°C) | $t_{1/2}$ (37°C)<br>years |
| 67                                          | 0.03765 | 0.01291         | 53.7                      | 0.03450         | 20.1                      | 71                                | 0.08086 | 0.00777         | 89.2                      |
| 69                                          | 0.05766 | 0.00843         | 82.2                      | 0.02253         | 30.8                      | 83                                | 0.08011 | 0.00784         | 88.4                      |
| 87                                          | 0.05493 | 0.00885         | 78.3                      | 0.02365         | 29.3                      | 76                                | 0.07295 | 0.00861         | 80.5                      |
| 66                                          | 0.04745 | 0.01024         | 67.7                      | 0.02738         | 25.3                      | 83                                | 0.08253 | 0.00761         | 91.1                      |
| 88                                          | 0.06366 | 0.00763         | 90.8                      | 0.02041         | 34.0                      | 69                                | 0.06369 | 0.00986         | 70.3                      |
| 56                                          | 0.04215 | 0.01153         | 60.1                      | 0.03082         | 22.5                      | 69                                | 0.06530 | 0.00962         | 72.0                      |
| 76                                          | 0.06273 | 0.00775         | 89.5                      | 0.02071         | 33.5                      | 81                                | 0.10012 | 0.00628         | 110.5                     |
| 69                                          | 0.04977 | 0.00976         | 71.0                      | 0.02610         | 26.6                      | 90                                | 0.09937 | 0.00632         | 109.6                     |
| 77                                          | 0.06253 | 0.00777         | 89.2                      | 0.02077         | 33.4                      | 79                                | 0.07074 | 0.00888         | 78.0                      |
| 59                                          | 0.06116 | 0.00795         | 87.2                      | 0.02124         | 32.6                      | 76                                | 0.07193 | 0.00873         | 79.4                      |
| 54                                          | 0.04883 | 0.00995         | 69.6                      | 0.02660         | 26.1                      | 65                                | 0.05979 | 0.01051         | 66.0                      |
| 79                                          | 0.04903 | 0.00991         | 69.9                      | 0.02650         | 26.2                      | 57                                | 0.06954 | 0.00903         | 76.7                      |
| 75                                          | 0.04396 | 0.01106         | 62.7                      | 0.02955         | 23.5                      | 79                                | 0.08235 | 0.00763         | 90.9                      |
| 62                                          | 0.05671 | 0.00857         | 80.9                      | 0.02290         | 30.3                      | 76                                | 0.06055 | 0.01038         | 66.8                      |
| 65                                          | 0.05291 | 0.00919         | 75.5                      | 0.02455         | 28.2                      | 92                                | 0.08023 | 0.00783         | 88.5                      |
| 59                                          | 0.04975 | 0.00977         | 71.0                      | 0.02611         | 26.5                      | 89                                | 0.07861 | 0.00799         | 86.7                      |
| 60                                          | 0.05081 | 0.00957         | 72.5                      | 0.02557         | 27.1                      | 72                                | 0.09211 | 0.0068          | 101.6                     |
| 64                                          | 0.05382 | 0.00903         | 76.8                      | 0.02414         | 28.7                      | 90                                | 0.10671 | 0.00589         | 117.7                     |
| 74                                          | 0.06152 | 0.0079          | 87.7                      | 0.02111         | 32.8                      |                                   |         |                 |                           |
| <b>mean</b>                                 |         |                 | <b>75.6</b>               |                 | <b>28.3</b>               |                                   |         |                 | <b>86.9</b>               |
| <b>SD</b>                                   |         |                 | <b>10.6</b>               |                 | <b>4.0</b>                |                                   |         |                 | <b>15.2</b>               |

Based on our racemization data, the calculated mean  $t_{1/2}$  (half-life) of collagen turnover was  $28.3 \pm 4.0$  years for OA knees at  $37^\circ\text{C}$  and  $86.9 \pm 15.2$  years for OA hips at  $37^\circ\text{C}$  ( $p < 0.0001$ ). Since racemization is a physical process, physical factors, such as pH or temperature can impact rates of racemization. We therefore considered the possibility that temperature differences in knees and hips might account, at least in part, for different amounts of racemized amino acids in cartilages from these different joints. We therefore re-estimated the half-life of collagen turnover based on a conservative assumption of an intra-articular temperature of  $33^\circ\text{C}$  in knees, representing a  $4^\circ\text{C}$  lower intra-articular temperature than for hips. The calculated mean  $t_{1/2}$  of collagen turnover for OA knee at  $33^\circ\text{C}$  was  $75.6 \pm 10.6$ ; this was still significantly shorter than the mean  $t_{1/2}$  for OA hip collagen ( $p = 0.012$ ).

1. Haimovici N. Three years experience in direct intraarticular temperature measurement. *Prog Clin Biol Res* 1982;107:453-61.
2. Sivan SS, Wachtel E, Roughley P. Structure, function, aging and turnover of aggrecan in the intervertebral disc. *Biochim Biophys Acta* 2014;1840(10):3181-9.
3. Sivan SS, Wachtel E, Tsitron E, Sakkee N, van der Ham F, Degroot J, Roberts S, Maroudas A. Collagen turnover in normal and degenerate human intervertebral discs as determined by the racemization of aspartic acid. *J Biol Chem* 2008;283(14):8796-801.
4. Bada J. Racemization of amino acids in fossil bones and teeth from the Olduvai Gorge region, Tanzania, East Africa. *Earth Planetary Science Letters* 1981;55(2):292-298.
